# Supplementary material for: Mixed-phase titania foams via 3D-printing for pharmaceutical degradation
Source: Royal Society of Chemistry journal article supplement (doi:10.1039/d4ta00869c), 2024-01-01
Supplement: d4ta00869c1.pdf [file d4ta00869c1.pdf]

Supplementary Information for

**Mixed-Phase Titania foams via 3D-Printing for Pharmaceutical Degradation**

Zachary Warren<sup>a,b</sup>, Thais Tasso Guaraldo<sup>c</sup>, Ivan Barisic<sup>b</sup>, Garyfalia Zoumpoulis<sup>b</sup>, Jannis Wenk, Davide Mattia<sup>\*b</sup>

**Text S1. Quantum yield calculations**

The quantum yield allows for an assessment of the photon efficiency, assessing the number of pollutant molecules undergoing degradation relative to the number of photons reaching the catalyst surface <sup>1</sup>. Based on the definitions contained in the IUPAC glossary, the following equations are proposed to calculate the quantum yield of photocatalytic foams:

$$k' = (k)(C_0)(V_{Illuminated}) \text{ (mol s}^{-1}\text{)} \quad (S1)$$

$$N_p = \frac{I_{\alpha\lambda} * S * t}{E_p} \text{ (-)} \quad (S2)$$

$$q_{n,p} = \left(\frac{N_p}{t}\right) \frac{1}{N_A} \text{ (mol s}^{-1}\text{)} \quad (S3)$$

$$\phi = \frac{k'}{q_{n,p}} \text{ (-)} \quad (S4)$$

where,  $k'$  is the rate of pollutant degradation ( $\text{mol s}^{-1}$ ),  $k$  is the kinetic constant ( $\text{s}^{-1}$ ),  $C_0$  is the initial pollutant concentration ( $\text{mol L}^{-1}$ ),  $V_{Illuminated}$  is the volume of pollutant irradiated.

The number of photons can be calculated using Equation S1, where  $I_{\alpha\lambda}$  is the attenuated irradiance of the light source accounting for absorbance of the medium and the pollutant molecule(s) ( $\text{W m}^{-2}$ ),  $S$  is the surface of the sample onto which the light impinges ( $\text{m}^2$ ) and  $t$  is the time under irradiation.

$E_p = \frac{h * c}{\lambda}$  ( $J$ ) is the photon energy at the wavelength emitted by the lamps, where  $h$  is Planck's constant,  $c$  is the speed of light and  $\lambda$  is the wavelength of light ( $\text{m}$ ) from the lamps. The photon flux is the numbers of photons during irradiation of a mol of photons, where  $N_A$  is Avogadro's number (equation 3). Finally, the quantum yield ( $\phi$ ) is calculated using equation 4.

Text S2. Photocatalytic reactor energy consumption calculations.

To assess the viability of scaling up of the system, the energy consumption of the reactor was accounted for by using the electrical energy per order ( $E_{EO}$ ), defined as the kilowatt hours of electrical energy needed to decrease the concentration of a pollutant by an order of magnitude (90%) in one cubic metre of solution. <sup>2</sup>

$$E_{EO} = \frac{P * t * I * 1,000}{V(\log \frac{C_0}{C_t})} \quad (S5)$$

Where: P is the total power output of the 3 lamps onto the 12 cm long quartz tube (kW), t is the irradiation time (hrs) V is the volume of reservoir (L) and C<sub>0</sub> and C<sub>t</sub> are the initial and final concentrations of pollutants respectively. As the foam occupied only a fraction of the quartz tube, the total power of the lamps, which act on the whole quartz tube, was multiplied by the volumetric fraction occupied by the foam (i.e. foam volume/quartz tube volume), to provide the effective power used for photocatalysis, considering that the contribution of photolysis is negligible. This is rendered necessary by the recirculating nature of the reactor, unlike a simple batch reactor, where the entire reservoir would be irradiated. In the present work, the external diameter of the foam corresponds to the internal diameter of the tube, so that the volumetric fraction is equivalent to the ratio of the foam's length to the total length of the quartz tube: 3 cm/12 cm = 0.25. For the recirculating foam reactors, three 5 W lamps were used, giving a P value of 15 X 10<sup>-3</sup> kW, irradiation time was 120 minutes, volume of solution was 0.5 L, and the volumetric fraction 0.25.

Table S1: Final parameters for 3D printing of modified resin structures

| From layer | To layer | Exposure time (s) | Lift height (mm) | Lift Speed up (mm/s) | Lift Speed down (mm/s) | Delay (s) |
|------------|----------|-------------------|------------------|----------------------|------------------------|-----------|
| 1          | 1        | 90                | 6                | 5                    | 150                    | 0.5       |
| 2          | 4        | 45                | 5.5              | 5                    | 150                    | 0.5       |
| 5          | 40       | 20                | 4                | 5                    | 150                    | 0.5       |
| 41         | 70       | 20                | 4                | 5                    | 150                    | 0.5       |
| 71         | 110      | 15                | 3.5              | 5                    | 150                    | 0.5       |
| 111        | 160      | 15                | 3.5              | 5                    | 150                    | 0.5       |
| 161        | 350      | 15                | 3.5              | 5                    | 150                    | 0.5       |
| 351        | 1203     | 15                | 3.5              | 5                    | 150                    | 0.5       |

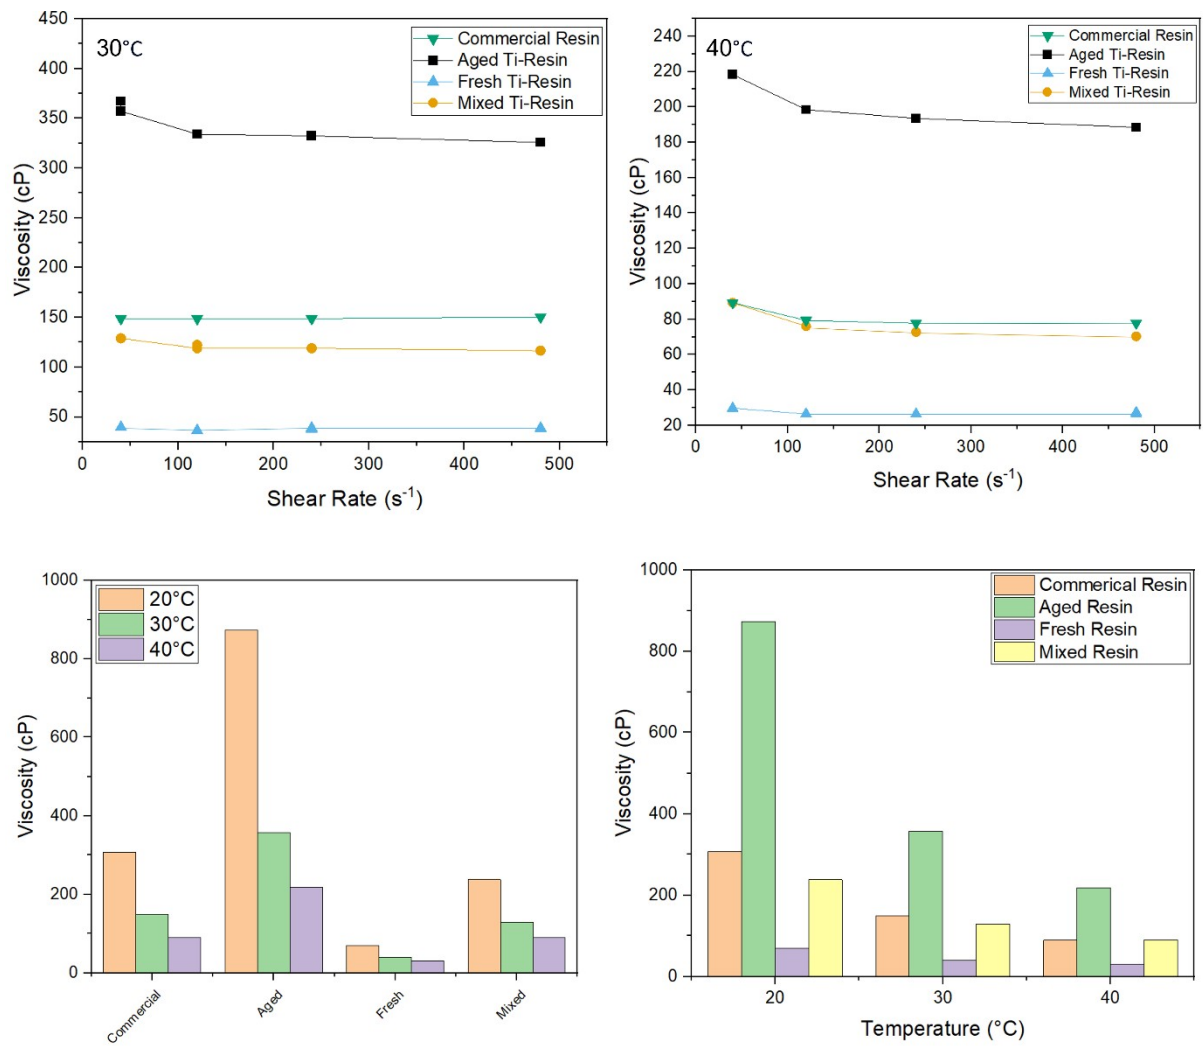

Figure S 1: Rheometric analysis of commercial and modified resins at a range of temperatures.

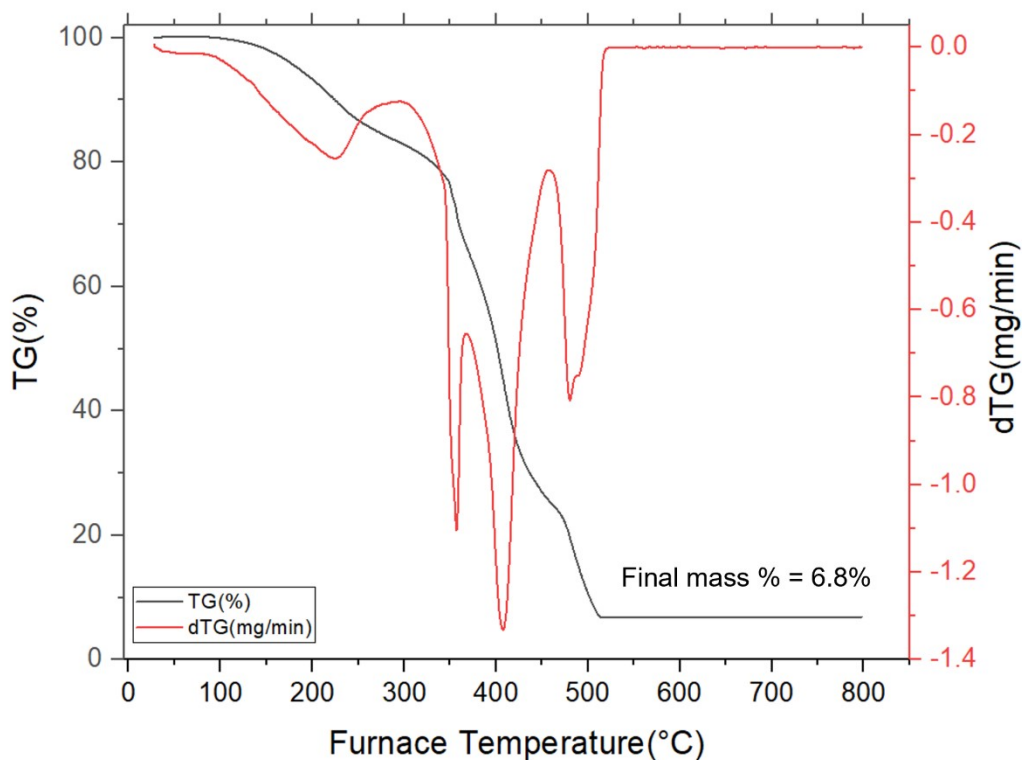

Figure S 2: Thermogravimetric analysis of the synthesised Ti (IV) acrylate photoresist.

Table S2: Normalised peak intensity of raman spectra for anatase and rutile  $\text{TiO}_2$  peaks.

| Sample                    | Anatase                     |                              |                              | Rutile                    |                           |                              |
|---------------------------|-----------------------------|------------------------------|------------------------------|---------------------------|---------------------------|------------------------------|
|                           | Normalised Raman intensity  |                              |                              |                           |                           |                              |
|                           | $E_g / 140 \text{ cm}^{-1}$ | $B_{1g} 395 \text{ cm}^{-1}$ | $A_{1g} 500 \text{ cm}^{-1}$ | SOE $240 \text{ cm}^{-1}$ | $E_g 445 \text{ cm}^{-1}$ | $A_{1g} 610 \text{ cm}^{-1}$ |
| 650 °C, 1hr/ 600 °C, 30hr | 1.000                       | 0.078                        | 0.049                        | 0.048                     | 0.176                     | 0.242                        |
| 750 °C, 1hr/ 700 °C, 30hr | 0.659                       | 0.000                        | 0.021                        | 0.186                     | 0.898                     | 1.000                        |
| 850 °C, 1hr/ 800 °C, 30hr | 0.130                       | 0.000                        | 0.009                        | 0.203                     | 0.917                     | 1.000                        |

Table S3: Normalised peak intensity ratio of raman spectra for anatase  $\text{TiO}_2$  peaks.

| Sample                    | Anatase                     |                              |                              |                |                |                   |
|---------------------------|-----------------------------|------------------------------|------------------------------|----------------|----------------|-------------------|
|                           | Normalised Raman intensity  |                              |                              | Ratio          |                |                   |
|                           | $E_g / 140 \text{ cm}^{-1}$ | $B_{1g} 395 \text{ cm}^{-1}$ | $A_{1g} 500 \text{ cm}^{-1}$ | $A_{1g} / E_g$ | $B_{1g} / E_g$ | $A_{1g} / B_{1g}$ |
| 650 °C, 1hr/ 600 °C, 30hr | 1.000                       | 0.078                        | 0.049                        | 0.049          | 0.078          | 0.628             |
| 750 °C, 1hr/ 700 °C, 30hr | 0.659                       | 0.000                        | 0.021                        | 0.032          | 0.000          | /                 |
| 850 °C, 1hr/ 800 °C, 30hr | 0.13                        | 0.000                        | 0.009                        | 0.000          | 0.000          | /                 |

Table S4: Normalised peak intensity ratio of raman spectra for rutile TiO<sub>2</sub> peaks.

| Sample                    | Rutile                     |                                     |                                      |                                  |
|---------------------------|----------------------------|-------------------------------------|--------------------------------------|----------------------------------|
|                           | Normalised Raman intensity |                                     |                                      | Ratio                            |
|                           | SOE 240 cm <sup>-1</sup>   | E <sub>G</sub> 445 cm <sup>-1</sup> | A <sub>1g</sub> 610 cm <sup>-1</sup> | A <sub>1g</sub> / E <sub>g</sub> |
| 650 °C, 1hr/ 600 °C, 30hr | 0.048                      | 0.176                               | 0.242                                | 1.375                            |
| 750 °C, 1hr/ 700 °C, 30hr | 0.186                      | 0.898                               | 1.000                                | 1.114                            |
| 850 °C, 1hr/ 800 °C, 30hr | 0.203                      | 0.917                               | 1.000                                | 1.091                            |

Table S5: Comparison of normalised peak intensity ratios of raman spectra for anatase and rutile TiO<sub>2</sub> peaks.

| Sample                    | Comparison                              |                                        |                                          |
|---------------------------|-----------------------------------------|----------------------------------------|------------------------------------------|
|                           | Ratio                                   |                                        |                                          |
|                           | An-E <sub>g</sub> / Ru- A <sub>1g</sub> | An-E <sub>g</sub> / Ru- E <sub>g</sub> | An-A <sub>1g</sub> / Ru- A <sub>1g</sub> |
| 650 °C, 1hr/ 600 °C, 30hr | 4.132                                   | 5.682                                  | 0.202                                    |
| 750 °C, 1hr/ 700 °C, 30hr | 0.659                                   | 0.734                                  | 0.021                                    |
| 850 °C, 1hr/ 800 °C, 30hr | 0.130                                   | 0.142                                  | 0.009                                    |

## Comparison with literature.

Table S6: CBZ photocatalytic degradation kinetics for slurries and immobilised systems reported from literature.

| Photocatalyst           | Material                         | Degradation conditions                                                                                                                                                                                                                                             | E <sub>0</sub> | QY                      | Ref |
|-------------------------|----------------------------------|--------------------------------------------------------------------------------------------------------------------------------------------------------------------------------------------------------------------------------------------------------------------|----------------|-------------------------|-----|
| Immobilised Catalyst    | TiO <sub>2</sub>                 | Flow photocatalytic membrane reactor                                                                                                                                                                                                                               | 2994.0         | 3.32 X 10 <sup>-5</sup> | 3   |
|                         | N-TiO <sub>2</sub>               | Volume 200 mL<br>Xenon lamp(300 W, 76.7 mW cm <sup>-2</sup> )                                                                                                                                                                                                      | 1000.0         | 7.06 X 10 <sup>-5</sup> |     |
|                         | TiO <sub>2</sub>                 | Batch reactor<br>500 mL volume<br>Xe high intensity lamp (55 W, 1.26 mW cm <sup>-2</sup> , 475 nm)                                                                                                                                                                 | 12902.7        | 3.84 X 10 <sup>-7</sup> | 4   |
| Nanoparticle suspension | TiO <sub>2</sub>                 | Batch reactor<br>50 mL volume<br>Hg Lamps (6 X 8 W, 1.6mW cm <sup>-2</sup> , 365 nm)                                                                                                                                                                               | 191.0          | 4.66 X 10 <sup>-5</sup> | 5   |
|                         | ZnO                              | Batch reactor<br>100 mL volume<br>Temperature: 25 °C<br>Xenon Lamp,<br>(5 KW, 5.5 W cm <sup>-2</sup> , 6000 K, 483 nm)                                                                                                                                             | 46.4           | 3.55 X 10 <sup>-4</sup> | 6   |
|                         | ZnFe <sub>2</sub> O <sub>4</sub> | Batch reactor<br>250 mL reactor<br>Compact fluorescent lamp (9 W, 320 μW cm <sup>-2</sup> , 365 nm)                                                                                                                                                                | 4.6            | 3.52 X 10 <sup>-3</sup> | 7   |
|                         | ZnFe <sub>2</sub> O <sub>4</sub> | Batch reactor<br>250 mL reactor<br>Compact fluorescent lamp (9 W, 320 μW cm <sup>-2</sup> , 365 nm)                                                                                                                                                                | 4.6            | 3.52 X 10 <sup>-3</sup> | 7   |
|                         | C- TiO <sub>2</sub>              | Batch reactor<br>400 mL volume<br>Tungsten lamp (150 W, 6.3mW cm <sup>-2</sup> , 400 nm)                                                                                                                                                                           | 166.3          | 4.64 X 10 <sup>-8</sup> | 8   |
|                         | TiO <sub>2</sub>                 | Batch reactor<br>350 mL reactor<br>9 W UV-A lamp, 3.16 Wm <sup>-2</sup> (Radium Ralutec lamp, 9 W/78, λ=350-400 nm)                                                                                                                                                | 85.4           | 2.60 X 10 <sup>-4</sup> | 9   |
| Foam                    | ZnO                              | Recirculating reactor, flow rate 250 mL min <sup>-1</sup> , 500 mL volume<br>Lamps (3 X 5 W, 10.3 mW cm <sup>-2</sup> , 254 nm)<br>Recirculating reactor, flow rate 250 mL min <sup>-1</sup> , 500 mL volume<br>Lamps (3 X 5 W, 10.3 mW cm <sup>-2</sup> , 254 nm) | 19.5           | 2.63 X 10 <sup>-3</sup> | 10  |
|                         | ZnO                              |                                                                                                                                                                                                                                                                    | 19.0           | 2.25 X 10 <sup>-3</sup> | 11  |
|                         | 1% Co-ZnO                        |                                                                                                                                                                                                                                                                    | 105.0          | 1.40 X 10 <sup>-4</sup> | 12  |
|                         | 2% Co-ZnO                        |                                                                                                                                                                                                                                                                    | 145.0          | 1.31 X 10 <sup>-4</sup> |     |
|                         | 1% Ni-ZnO                        |                                                                                                                                                                                                                                                                    | 100.0          | 2.01 X 10 <sup>-4</sup> |     |
|                         | 2% Ni-ZnO                        |                                                                                                                                                                                                                                                                    | 82.0           | 1.20 X 10 <sup>-4</sup> |     |
|                         | 1% Cu-ZnO                        |                                                                                                                                                                                                                                                                    | 145.0          | 1.34 X 10 <sup>-4</sup> |     |
|                         | 2% Cu-ZnO                        |                                                                                                                                                                                                                                                                    | 145.0          | 9.68 X 10 <sup>-5</sup> |     |
|                         | TiO <sub>2</sub>                 |                                                                                                                                                                                                                                                                    | 67.6           | 7.58 X 10 <sup>-4</sup> |     |

## References

1. N. Serpone and A. Salinaro, *Pure and Applied Chemistry*, 1999, **71**, 303-320.
2. J. R. Bolton, K. G. Bircher, W. Tumas and C. A. Tolman, *Pure and Applied Chemistry*, 2001, **73**, 627-637.
3. I. Horovitz, D. Avisar, M. A. Baker, R. Grilli, L. Lozzi, D. Di Camillo and H. Mamane, *J Hazard Mater*, 2016, **310**, 98-107.
4. Y. He, N. B. Sutton, H. H. H. Rijnaarts and A. A. M. Langenhoff, *Applied Catalysis B: Environmental*, 2016, **182**, 132-141.
5. S. Teixeira, R. Gurke, H. Eckert, K. Kühn, J. Fauler and G. Cuniberti, *Journal of Environmental Chemical Engineering*, 2016, **4**, 287-292.
6. H. Mohan, V. Ramalingam, A. Adithan, K. Natesan, K. K. Seralathan and T. Shin, *J Hazard Mater*, 2021, **416**, 126209.
7. A. Kumar, M. Khan, L. Fang and I. M. C. Lo, *J Hazard Mater*, 2019, **370**, 108-116.
8. A. Surejan, B. Sambandam, T. Pradeep and L. Philip, *Journal of Environmental Chemical Engineering*, 2017, **5**, 757-767.
9. A. Jelic, I. Michael, A. Achilleos, E. Hapeshi, D. Lambropoulou, S. Perez, M. Petrovic, D. Fatta-Kassinou and D. Barcelo, *J Hazard Mater*, 2013, **263 Pt 1**, 177-186.
10. Z. Warren, T. T. Guaraldo, J. Wenk and D. Mattia, *Journal of Materials Chemistry A*, 2022, **10**, 11542-11552.
11. T. T. Guaraldo, R. Vakili, J. Wenk and D. Mattia, *Chemical Engineering Journal*, 2022, DOI: 10.1016/j.cej.2022.140784.
12. Z. Warren, J. Wenk and D. Mattia, *RSC Advances*, 2023, **13**, 2438-2450.
